# Supplementary material
Source: PubMed Central journal article supplement (PMC5661287)

## Supplemental Figure Legends

### Supplemental Figure 1. Distribution of MBL levels according to *MBL2* genotypes

**in patients with IgAN and healthy controls.** Bar plot showing the distribution of

MBL levels in IgAN patients and healthy controls with different *MBL2* genotypes.

The number of patients with different *MBL2* genotypes is indicated by the n below the

plot. When MBL levels were compared between IgAN patients and healthy controls

with same genotypes, \* indicated  $p < 0.05$  while \*\* indicated  $p < 0.01$ .

**Supplemental Table 1. Distribution of allele and genotype frequencies of *MBL2* gene variants in IgAN patients and healthy controls.**

| Variant                            | Genotype      | Count (frequency) |                  | p-value | Allele | Count (frequency) |                  | p-value |
|------------------------------------|---------------|-------------------|------------------|---------|--------|-------------------|------------------|---------|
|                                    |               | IgAN              | Healthy controls |         |        | IgAN              | Healthy controls |         |
| c.-550G>C (rs11003125)             | CC            | 151 (20.2)        | 108 (22.1)       | 0.392   | C      | 656 (43.8%)       | 455 (46.5%)      | 0.182   |
|                                    | GC            | 354 (47.3)        | 239 (48.9)       |         | G      | 842 (56.2%)       | 523 (53.5%)      |         |
|                                    | GG            | 244 (32.6)        | 142 (29.0)       |         |        |                   |                  |         |
| c.-427A>C (rs11003124)             | AA            | 577 (77.0)        | 375 (76.7)       | 0.971   | A      | 1316 (87.9%)      | 858 (87.7%)      | 0.929   |
|                                    | AC            | 162 (21.6)        | 108 (22.1)       |         | C      | 182 (12.1%)       | 120 (12.3%)      |         |
|                                    | CC            | 10 (1.3)          | 6 (1.2)          |         |        |                   |                  |         |
| c.-349A>G (rs7084554)              | AA            | 577 (77.0)        | 375 (76.7)       | 0.971   | A      | 1316 (87.9%)      | 858 (87.7%)      | 0.929   |
|                                    | AG            | 162 (21.6)        | 108 (22.1)       |         | G      | 182 (12.1%)       | 120 (12.3%)      |         |
|                                    | GG            | 10 (1.3)          | 6 (1.2)          |         |        |                   |                  |         |
| c.-336A>G (rs36014597)             | AA            | 577 (77.0)        | 375 (76.7)       | 0.971   | A      | 1316 (87.9%)      | 858 (87.7%)      | 0.929   |
|                                    | AG            | 162 (21.6)        | 108 (22.1)       |         | G      | 182 (12.1%)       | 120 (12.3%)      |         |
|                                    | GG            | 10 (1.3)          | 6 (1.2)          |         |        |                   |                  |         |
| c.-324_-329 delAAAGAG (rs10556764) | AAAGAG/AAAGAG | 577 (77.0)        | 375 (76.7)       | 0.971   | AAAGAG | 1316 (87.9%)      | 858 (87.7%)      | 0.929   |
|                                    | AAAGAG/del    | 162 (21.6)        | 108 (22.1)       |         | del    | 182 (12.1%)       | 120 (12.3%)      |         |
|                                    | del/del       | 10 (1.3)          | 6 (1.2)          |         |        |                   |                  |         |
| c.-221G>C (rs7096206)              | CC            | 21 (2.8)          | 8 (1.6)          | 0.372   | C      | 181 (12.1%)       | 113 (11.6%)      | 0.691   |
|                                    | GC            | 139 (18.6)        | 97 (19.8)        |         | G      | 1317 (87.1%)      | 865 (88.4%)      |         |
|                                    | GG            | 589 (78.6)        | 384 (78.5)       |         |        |                   |                  |         |
| c.-70C>T (rs11003123)              | CC            | 577 (77.0)        | 375 (76.7)       | 0.971   | C      | 1316 (87.9%)      | 858 (87.7%)      | 0.929   |
|                                    | TC            | 162 (21.6)        | 108 (22.1)       |         | T      | 182 (12.1%)       | 120 (12.3%)      |         |
|                                    | TT            | 10 (1.3)          | 6 (1.2)          |         |        |                   |                  |         |
| c.4C>T (rs7095891)                 | CC            | 577 (77.0)        | 375 (76.7)       | 0.971   | C      | 1316 (87.9%)      | 858 (87.7%)      | 0.929   |

|                      |    |            |             |        |   |              |             |        |
|----------------------|----|------------|-------------|--------|---|--------------|-------------|--------|
|                      | TC | 162 (21.6) | 108 (22.1)  |        | T | 182 (12.1%)  | 120 (12.3%) |        |
|                      | TT | 10 (1.3)   | 6 (1.2)     |        |   |              |             |        |
| c.223C>T (rs5030737) | CC | 747 (99.7) | 488 (99.8)  | 0.827* | C | 1496 (99.9%) | 977 (99.9%) | 0.655* |
|                      | TC | 2 (0.3)    | 1 (0.2)     |        | T | 2 (0.1%)     | 1 (0.1%)    |        |
|                      | TT | 0 (0.0)    | 0 (0.0)     |        |   |              |             |        |
| c.230G>A (rs1800450) | AA | 16 (2.1)   | 10 (2.0)    | 0.083  | A | 210 (14.0)   | 164 (16.8%) | 0.062  |
|                      | AG | 178 (23.8) | 144 (29.4)  |        | G | 1288 (86.0%) | 814 (83.2%) |        |
|                      | GG | 555 (74.1) | 335 (68.5)  |        |   |              |             |        |
| c.239G>A (rs1800451) | AA | 0 (0.0)    | 0 (0.0)     | 0.419* | A | 1 (0.1%)     | 0 (0%)      | 0.605* |
|                      | AG | 1 (0.1)    | 0 (0.0)     |        | G | 1497 (99.9%) | 978 (100%)  |        |
|                      | GG | 748 (99.9) | 489 (100.0) |        |   |              |             |        |

---

Note: \* p value was calculated by Fisher's exact test.

**Supplemental Table 2. Distribution of the *MBL2* A allele/O allele group in IgAN patients and healthy controls.**

| <b>Variant</b>      | <b>IgAN</b>       | <b>Healthy controls</b> | <b>p-value</b> |
|---------------------|-------------------|-------------------------|----------------|
| Genotype            | Count (frequency) | Count (frequency)       | 0.100          |
| AA                  | 552 (73.3)        | 334 (68.3%)             |                |
| AO                  | 181 (24.2%)       | 145 (29.7%)             |                |
| OO                  | 16 (2.1%)         | 10 (2.0%)               |                |
| Allele/Allele group | Count (frequency) | Count (frequency)       | 0.073          |
| A                   | 1285 (85.8%)      | 813 (83.1%)             |                |
| O                   | 213 (14.2%)       | 165 (16.9%)             |                |

**Supplemental Table 3. Distribution of haplotype frequencies of the *MBL2* gene in IgAN patients and healthy controls.**

| Haplotype | Count |                  | Frequency |                  | p-value | Odds ratio (95% CI)  |
|-----------|-------|------------------|-----------|------------------|---------|----------------------|
|           | IgAN  | Healthy controls | IgAN      | Healthy controls |         |                      |
| LYPB      | 205   | 161              | 0.137     | 0.165            | 0.06    | 0.799 (0.633, 1.010) |
| LXPA      | 176   | 113              | 0.117     | 0.116            | 0.864   | 0.977 (0.753, 1.268) |
| LYP A     | 96    | 61               | 0.064     | 0.062            | 0.943   | 0.988 (0.704, 1.386) |
| LYQA      | 178   | 120              | 0.119     | 0.123            | 0.584   | 0.931 (0.720, 1.203) |
| HYP A     | 827   | 519              | 0.552     | 0.531            | 0.249   | reference            |
| Rare      | 16    | 4                | 0.011     | 0.004            | 0.101   | 2.510 (0.835, 7.550) |
| HYPB      | 5     | 3                | 0.003     | 0.003            | -       | -                    |
| HYPD      | 2     | 1                | 0.001     | 0.001            | -       | -                    |
| HXPA      | 5     | 0                | 0.003     | 0.000            | -       | -                    |
| HYQA      | 3     | 0                | 0.002     | 0.000            | -       | -                    |
| LYQC      | 1     | 0                | 0.001     | 0.000            | -       | -                    |

**Supplemental Table 4. Power for genetic association analysis between variants/haplotypes in *MBL2* and IgAN susceptibility.**

| <b>Variants/haplotypes</b>         | <b>Genetic analysis</b>                                          | <b>Power</b> |
|------------------------------------|------------------------------------------------------------------|--------------|
| c.-550G>C (rs11003125)             | genotype frequencies comparison (GG/GC/CC)                       | 0.608        |
|                                    | allele frequencies comparison (G/C)                              | 0.818        |
| c.-427A>C (rs11003124)             | genotype frequencies comparison (AA/AC/CC)                       | 0.029        |
|                                    | allele frequencies comparison (A/C)                              | 0.071        |
| c.-349A>G (rs7084554)              | genotype frequencies comparison (AA/AG/GG)                       | 0.029        |
|                                    | allele frequencies comparison (A/G)                              | 0.071        |
| c.-336A>G (rs36014597)             | genotype frequencies comparison (AA/AG/GG)                       | 0.029        |
|                                    | allele frequencies comparison (A/G)                              | 0.071        |
| c.-324_-329 delAAAGAG (rs10556764) | genotype frequencies comparison (II/ID/DD)                       | 0.029        |
|                                    | allele frequencies comparison (I/D)                              | 0.071        |
| c.-221G>C (rs7096206)              | genotype frequencies comparison (GG/GC/CC)                       | 0.628        |
|                                    | allele frequencies comparison (G/C)                              | 0.309        |
| c.-70C>T (rs11003123)              | genotype frequencies comparison (CC/CT/TT)                       | 0.029        |
|                                    | allele frequencies comparison (C/T)                              | 0.071        |
| c.4C>T (rs7095891)                 | genotype frequencies comparison (CC/CT/TT)                       | 0.029        |
|                                    | allele frequencies comparison (C/T)                              | 0.071        |
| c.223C>T (rs5030737)               | genotype frequencies comparison (CC/CT/TT)                       | 0.175        |
|                                    | allele frequencies comparison (C/T)                              | 0.000        |
| c.230G>A (rs1800450)               | genotype frequencies comparison (GG/GA/AA)                       | 0.917        |
|                                    | allele frequencies comparison (G/A)                              | 0.938        |
| c.239G>A (rs1800451)               | genotype frequencies comparison (GG/GA/AA)                       | 0.684        |
|                                    | allele frequencies comparison (G/A)                              | 0.000        |
| variants combination in Exon1      | genotype frequencies comparison (AA/AO/OO)                       | 0.900        |
|                                    | allele frequencies comparison (A/O)                              | 0.927        |
| haplotypes                         | haplotype frequencies comparison (LYPB/LXPA/LYPA/LYQA/HYPA/Rare) | 0.771        |

**Supplemental Table 5. Primers used for PCR and PCR-SSP.**

| Method     | Forward primer     |                            | Reverse primer      |                            | Annealing temperature     | Amplified fragment         | Amplified genotypes |
|------------|--------------------|----------------------------|---------------------|----------------------------|---------------------------|----------------------------|---------------------|
|            | Primer name        | Primer sequence (5' to 3') | Primer name         | Primer sequence (5' to 3') |                           |                            |                     |
| PCR        | MBL2F              | TTGCCAGTGGTTTTGACTC        | MBL2R               | CAGGCAGTTTCCTCTGGAAG       | 54°C                      | 990 bp (from -677 to 313)  | all                 |
| PCR-SSP    | MBL2-P-U-F         | GGAGGAGGATTCAAGGCAAG       | MBL2-P-U-R          | TGTCTGTAGGAGCTTCCTCTTT     | 54°C                      | 399 bp (from -705 to -307) | HL/YY/PQ/AA         |
|            | MBL2-A-U-F         | GGGATGGAAAGCAGAAATCA       | MBL2-A-U-R          | CCCCTTTCTCCCTTGGTGTC       | 60°C                      | 1178 bp (from -929 to 249) | HL/YY/PP/AB         |
|            |                    |                            |                     |                            |                           |                            | HL/YY/PQ/AB         |
|            |                    |                            |                     |                            |                           |                            | LL/XY/PP/AB         |
|            |                    |                            |                     |                            |                           |                            | LL/YY/PQ/AB         |
|            | MBL2-C-U-F         | GAGTGGGATGGAAAGCAGAA       | MBL2-C-U-R          | ACCTGGTCCCCCTTTTCTC        | 62°C                      | 1191 bp (from -933 to 258) | HL/YY/PQ/AC         |
|            | MBL2F              | TTGCCAGTGGTTTTGACTC        | MBL2-X-U-R          | AGACTATAAACATGCTTTCG       | 54°C                      | 476 bp (from -677 to -202) | HL/XY/PP/AA         |
| MBL2-X-D-F | CATTGTCTCACTGCCACC | MBL2-X-D-R                 | TCATATCCCAGGCAGTTTC | 60°C                       | 562 bp (from -240 to 322) | LL/XY/PQ/AA                |                     |

Supplemental Figure 1

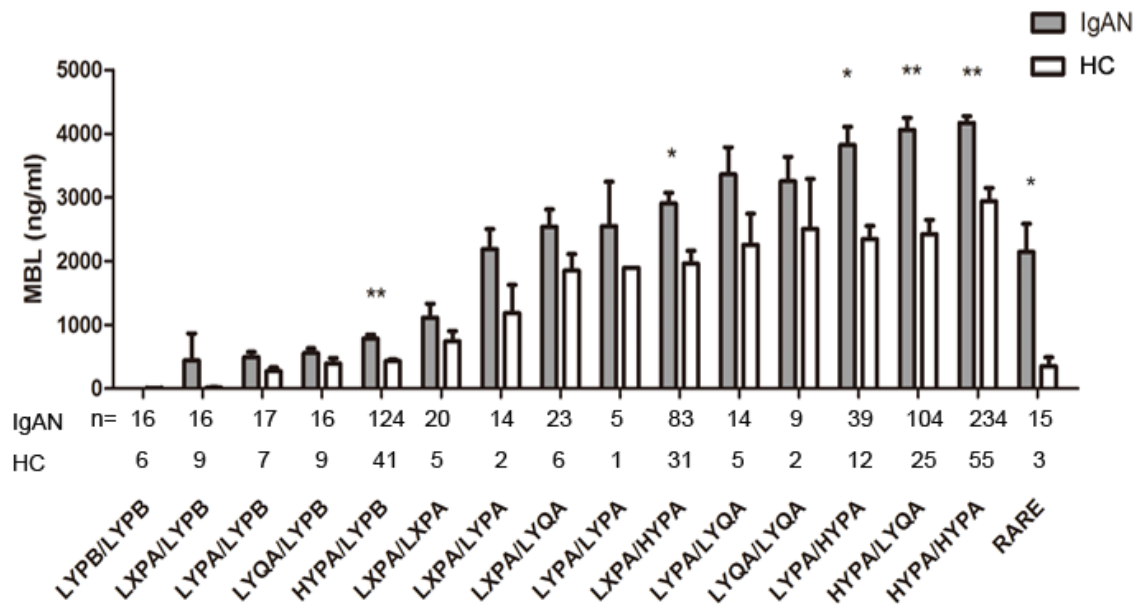

Supplement: ASN.2017010076SupplementaryData.pdf [file ASN.2017010076SupplementaryData.pdf]
